# Supplementary material for: Lineage commitment of embryonic cells involves MEK1-dependent clearance of pluripotency regulator Ventx2
Source: eLife. 2017 Jun 27;6:e21526. doi: 10.7554/eLife.21526 (PMC5487210; doi:10.7554/eLife.21526)
Supplement: Figure 1—figure supplement 1—source data 1. — Details are shown in Figure 1—figure supplement 1 and Materials and methods. DOI: http://dx.doi.org/10.7554/eLife.21526.004 [file elife-21526-fig1-figsupp1-data1.docx]

**Figure 1 -figure supplement1 –source data1**

**Values of blastopore closure ratios.** Details are shown in Figure 1-figure supplement 1 and Materials and Methods.

|  |
| --- |
| |  |  |  | | --- | --- | --- | |  |  |  | | **TYPE OF EMBRYOS** | **MEAN BLASTOPORE DIAMETER** | **BLASTOPORE**  **CLOSURE RATIO** | | Ctrl #1 | 0,085 | 1,40689655 | | Ctrl #2 | 0,04 | 0,66206897 | | Ctrl #3 | 0,05 | 0,82758621 | | Ctrl #4 | 0,11 | 1,82068966 | | Ctrl #5 | 0,05 | 0,82758621 | | Ctrl #6 | 0,02 | 0,33103448 | | Ctrl #7 | 0,01 | 0,16551724 | | Ctrl #8 | 0,06 | 0,99310345 | | Ctrl #9 | 0,04 | 0,66206897 | | Ctrl #10 | 0,065 | 1,07586207 | | Ctrl #11 | 0,15 | 2,48275862 | | Ctrl #12 | 0,045 | 0,74482759 | | Ctrl #13 | 0,05 | 0,82872928 | | Ctrl #14 | 0,1 | 1,65745856 | | Ctrl #15 | 0,03 | 0,49723757 | |  |  |  | | Mk #1 | 0,305 | 5,04827586 | | Mk #2 | 0,12 | 1,9862069 | | Mk #3 | 0,26 | 4,30344828 | | Mk #4 | 0,155 | 2,56551724 | | Mk #5 | 0,34 | 5,62758621 | | Mk #6 | 0,235 | 3,88965517 | | Mk #7 | 0,125 | 2,06896552 | | Mk #8 | 0,345 | 5,71034483 | | Mk #9 | 0,25 | 4,13793103 | | Mk #10 | 0,19 | 3,14482759 | | Mk #11 | 0,28 | 4,63448276 | | Mk #12 | 0,25 | 4,13793103 | | Mk #13 | 0,19 | 3,14482759 | | Mk #14 | 0,23 | 3,80689655 | | Mk #15 | 0,33 | 5,46206897 | | Mk #16 | 0,19 | 3,14482759 | | Mk #17 | 0,31 | 5,13103448 | | Mk #18 | 0,16 | 2,64827586 | |  |  |  | | Mk-MO #1 | 0,395 | 6,53793103 | | Mk-MO #2 | 0,325 | 5,37931034 | | Mk-MO#3 | 0,39 | 6,45517241 | | Mk-MO #4 | 0,395 | 6,53793103 | | Mk-MO #5 | 0,375 | 6,20689655 | | Mk-MO #6 | 0,305 | 5,04827586 | | Mk-MO #7 | 0,4 | 6,62068966 | | Mk-MO #8 | 0,315 | 5,2137931 | | Mk-MO #9 | 0,325 | 5,37931034 | | Mk-MO #10 | 0,385 | 6,37241379 | | Mk-MO #11 | 0,37 | 6,12413793 | | Mk-MO #12 | 0,38 | 6,28965517 | | Mk-MO #13 | 0,285 | 4,71724138 | | Mk-MO #14 | 0,335 | 5,54482759 | | Mk-MO #15 | 0,425 | 7,03448276 | | Mk-MO #16 | 0,41 | 6,7862069 | |  |  |  | | Mk-MO+Mk #1 | 0,32 | 5,29655172 | | Mk-MO+Mk #2 | 0,305 | 5,04827586 | | Mk-MO+Mk #3 | 0,405 | 6,70344828 | | Mk-MO+Mk #4 | 0,195 | 3,22758621 | | Mk-MO+Mk #5 | 0,31 | 5,13103448 | | Mk-MO+Mk #6 | 0,285 | 4,71724138 | | Mk-MO+Mk #7 | 0,015 | 0,24827586 | | Mk-MO+Mk #8 | 0,19 | 3,14482759 | | Mk-MO+Mk #9 | 0,37 | 6,12413793 | | Mk-MO+Mk #10 | 0,275 | 4,55172414 | | Mk-MO+Mk #11 | 0,12 | 1,9862069 | | Mk-MO+Mk #12 | 0,145 | 2,4 | | Mk-MO+Mk #13 | 0,255 | 4,22068966 | | Mk-MO+Mk #14 | 0,305 | 5,04827586 | | Mk-MO+Mk #15 | 0,43 | 7,11724138 | | Mk-MO+Mk #16 | 0,435 | 7,2 | | Mk-MO+Mk #17 | 0,33 | 5,46206897 | | Mk-MO+Mk #18 | 0,26 | 4,30344828 | | Mk-MO+Mk #19 | 0,27 | 4,46896552 | | Mk-MO+Mk #20 | 0,3 | 4,96551724 | | Mk-MO+Mk #21 | 0,44 | 7,28275862 | | Mk-MO+Mk #22 | 0,165 | 2,73103448 | | Mk-MO+Mk #23 | 0,13 | 2,15172414 | | Mk-MO+Mk #24 | 0,2 | 3,31034483 | | Mk-MO+Mk #25 | 0,46 | 7,6137931 | | Mk-MO+Mk #26 | 0,185 | 3,06206897 | | Mk-MO+Mk #27 | 0,06 | 0,99310345 | | Mk-MO+Mk #28 | 0,275 | 4,55172414 | | Mk-MO+Mk #29 | 0,155 | 2,56551724 | | Mk-MO+Mk #30 | 0,215 | 3,55862069 | | Mk-MO+Mk #31 | 0,18 | 2,97931034 | | Mk-MO+Mk #32 | 0,19 | 3,14482759 | | Mk-MO+Mk #33 | 0,2 | 3,31034483 | | Mk-MO+Mk #34 | 0,05 | 0,82758621 | | Mk-MO+Mk #35 | 0,135 | 2,23448276 | | Mk-MO+Mk #36 | 0,115 | 1,90344828 | | Mk-MO+Mk #37 | 0,01 | 0,16551724 | | Mk-MO+Mk #38 | 0,075 | 1,24137931 | |
