# Supplementary material for: Lineage commitment of embryonic cells involves MEK1-dependent clearance of pluripotency regulator Ventx2
Source: eLife. 2017 Jun 27;6:e21526. doi: 10.7554/eLife.21526 (PMC5487210; doi:10.7554/eLife.21526)
Supplement: Supplementary file 4. — DOI: http://dx.doi.org/10.7554/eLife.21526.017 [file elife-21526-supp4.xlsx]

## Sheet: Feuil1
Supplementary file 4: EMBOSS prediction of PEST destruction motifs in Ventx orthologs
Source	Entry	Gene Name	Specie	Clade	PEST	PEST SCORE	PEST SEQ.
Ensembl	SINCAMG00000012859	VentxA2	Callorhinchus milii	Chondrichthyes	YES	7.01	108-119
Ensembl	SINCAMP00000019661	VentxA1	Callorhinchus milii	Chondrichthyes	YES	7.04	120-131
Ensembl	SINCAMP00000019665	VentxB	Callorhinchus milii	Chondrichthyes	NO		NOT PREDICTED
Ensembl	ENSDARG00000014277	Vox	Danio rerio	Teleostei	YES	5.10	99-132
NCBI	XP_004076914	Vent1-like	Oryzia latipes	Teleostei		10.13	15-27
NCBI	XP_016342808	Ventx	Sinocyclocheilus anshuiensis	Teleostei	YES	14.77	63-91
Ensembl	ENSAMXG00000014524	Vox	Astyanax mexicanus	Teleostei	YES	7.15; 13.69	42-56 107-144
Ensembl	ENSLOCG00000007276	Vox	Lepisosteus oculatus	Lepisosteiformes	NO		NOT PREDICTED
Ensembl	ENSLACG00000010045	Ventx2	Latimeria chalumnae	Actinistia	NO		NOT PREDICTED
NCBI	NP_001081607	Ventx2.1	Xenopus laevis	Amphibia (Anura)	YES	8.72; 15.41	134-182
NCBI	NP_001080931	Ventx2.2	Xenopus laevis	Amphibia (Anura)	YES	17.08	131-172
Ensembl	ENSACAG00000006023	Ventx2	Anolis carolinensis	Squamata	YES	18.32	39-63
NCBI	XP_015675378	Ventx2	Protobothrops mucrosquamatus	Squamata	YES	8.81	71-111
NCBI	ETE60333	Ventx2	Ophiophagus hannah	Squamata	YES	8.65	134-159
NCBI	XP_007424441	Ventx2	Python bivittatus	Squamata	YES	8.27	37-64
NCBI	XP_012983199	Ventx2	Melopsittacus undulatus	Archosaura (Aves)	YES	18.68	39-57
Ensembl	ENSGALG00000028199	Ventx2	Gallus gallus	Archosaura (Aves)	PUTATIVE	4.43	63-75
NCBI	contig139023 *	Ventx2	Chelonia mydas	Testudines	YES	7.19	94-106
NCBI	XP_005304244	Ventx2	Chrysemys picta bellii	Testudines	YES	9.6	82-121
Ensembl	ENSPSIG00000003805	Ventx2	Pelodiscus sinensis	Testudines	PUTATIVE	4.46	145-157
Ensembl	ENSSHAG00000005440	Ventx	Sarcophilus harrisi	Marsupials (Dasyuridae)	YES	9.21	95-109
NCBI	XP_007506754	Ventx	Monodelphis domestica	Marsupials (Dasyuridae)	YES	9.29	42-54
Ensembl	ENST00000325980	VENTX	Homo sapiens	Euarchontoglires (Primates)	NO		NOT PREDICTED
Ensembl	ENSPTRT00000005878	Ventx	Pan troglodytes	Euarchontoglires (Primates)	NO		NOT PREDICTED
NCBI	XP_003922128	Ventx	Saimiri boliviensis	Euarchontoglires (Primates)	NO		NOT PREDICTED
NCBI	XP_003794144	Ventx	Otolemur garnettii	Euarchontoglires (Primates)	NO		NOT PREDICTED
Ensembl	ENSTBEG00000006909	Ventx	Tupaia belangeri	Euarchontoglires (Scandentia)	YES	8.07	60-88
NCBI	XP_004781940	Ventx	Mustela putorius furo	Laurasiatheria (Carnivora)	YES	5.68	49-65
NCBI	XP_003433698	Ventx	Canis lupus familiaris	Laurasiatheria (Carnivora)	NO		NOT PREDICTED
NCBI	XP_007079803	Ventx	Panthera tigris altaica	Laurasiatheria (Carnivora)	NO		NOT PREDICTED
Ensembl	ENSFCAP00000024292	Ventx	Felis catus	Laurasiatheria (Carnivora)	NO		NOT PREDICTED
NCBI	XP_002928754	Ventx	Ailuropoda melanoleuca	Laurasiatheria (Carnivora)	PUTATIVE	4.55	64-80
NCBI	XP_006745169	Ventx	Leptonychotes weddellii	Laurasiatheria (Carnivora)	YES	5.22	65-81
NCBI	XP_004395044	Ventx	Odobenus rosmarus	Laurasiatheria (Carnivora)	YES	7.93	65-76
NCBI	XP_004438912	Ventx	Ceratotherium simum	Laurasiatheria (Perisodactyla)	NO		NOT PREDICTED
NCBI	XP_014712383	Ventx	Equus asinus	Laurasiatheria (Perisodactyla)	YES	12.49; 8.89	66-79; 160-173
NCBI	XP_008523846	Ventx	Equus przewalskii	Laurasiatheria (Perisodactyla)	YES	8.89	54-67
NCBI	XP_003419745	Venxt	Loxodonta africana	Afrotheria (Proboscidae)	NO		NOT PREDICTED
Ensembl	ENSCHOG00000011176	Ventx	Choloepus hoffmanni	Xenarthra (Pilosa)	NO		NOT PREDICTED
