# Supplementary material for: Lineage commitment of embryonic cells involves MEK1-dependent clearance of pluripotency regulator Ventx2
Source: eLife. 2017 Jun 27;6:e21526. doi: 10.7554/eLife.21526 (PMC5487210; doi:10.7554/eLife.21526)
Supplement: Supplementary file 5. — DOI: http://dx.doi.org/10.7554/eLife.21526.018 [file elife-21526-supp5.xlsx]

## Sheet: Feuil1
Supplementary file 5: Probes used for WISH
Probe	Vector	Linearized	Transcribed	Reference
bmp4	pGEM7	XbaI	SP6	1
foxd5	pBSSK	XbaI	T7	2
gsc	pSK	EcoRI	T7	3
mixer	pCS300	AscI	SP6	4
pou5f3.2	pCS2+	EcoRI	T7	5
sox2	pBSSK	XbaI	T7	6
t/bra	pSP73	EcoRV	T7	7
ventx2	pBSKS	HindIII	T7	8
xk81a1	pGEM1	EcoRI	T7	9
1. Hemmati-Brivanlou A, Thomsen GH (1995) Ventral mesodermal patterning in Xenopus embryos: expression patterns and activities of BMP-2 and BMP-4. Dev Genet. 17(1):78-89.
2. Sullivan SA, Akers L, Moody SA (2001)FoxD5a, a Xenopus winged helix gene, maintains an immature neural ectoderm via transcriptional repression that is dependent on the C-terminal domain. Dev Biol. Apr 15;232(2):439-57.
3. Cho KW, Blumberg B, Steinbeisser H, De Robertis EM (1991) Molecular nature of Spemann's organizer: the role of the Xenopus homeobox gene goosecoid. Cell Dec 20;67(6):1111-20.
4. Henry GL, Melton DA (1998) Mixer, a homeobox gene required for endoderm development. Science Jul 3;281(5373):91-6.
5. Morrison GM, Brickman JM (2006) Conserved roles for Oct4 homologues in maintaining multipotency during early vertebrate development. Development May;133(10):2011-22.
6. Mizuseki K, Kishi M, Matsui M, Nakanishi S, Sasai Y (1998) Xenopus Zic-related-1 and Sox-2, two factors induced by chordin, have distinct activities in the initiation of neural induction. Development Feb;125(4):579-87.
7. Smith JC, Price BM, Green JB, Weigel D, Herrmann BG (1991) Expression of a Xenopus homolog of Brachyury (T) is an immediate-early response to mesoderm induction. Cell Oct 4;67(1):79-87.
8. Papalopulu N, Kintner C (1996) A Xenopus gene, Xbr-1, defines a novel class of homeobox genes and is expressed in the dorsal ciliary margin of the eye. Dev Biol. Feb 25;174(1):104-14.
9. Jonas EA, Snape AM, Sargent TD (1989) Transcriptional regulation of a Xenopus embryonic epidermal keratin gene. Development Jun;106(2):399-405.
