# Supplementary material for: Lineage commitment of embryonic cells involves MEK1-dependent clearance of pluripotency regulator Ventx2
Source: eLife. 2017 Jun 27;6:e21526. doi: 10.7554/eLife.21526 (PMC5487210; doi:10.7554/eLife.21526)
Supplement: Supplementary file 6. — DOI: http://dx.doi.org/10.7554/eLife.21526.019 [file elife-21526-supp6.xlsx]

## Sheet: Feuil1
Supplementary file 6: Primers used for RT-QPCR
Gene Name	Forward	Reverse	Ref.
a-tubulin	GTGACCCCCGTCATGGTAAAT	CGCTTGGTTTTTACTGTGGCA	5
bmp4	ACCCATAGCTGCAAATGGAC	CATGCTTCCCCTGATGAGTT	2
chd (chordin)	AACTGCCAGGACTGGATGGT	GGCAGGATTTAGAGTTGCTTC	15
chd1 (e-cadherin)	CGAAGATGTAAACGAAGCC	GCCATTTCCAGTGACAAT	6
dlx3	GGTTCAGCGAAATGTTCCAT	ATGGAGTGGCACTGGATTTC	1
eomes	TGGTCCTCAAGGTCAAGTCC	GGGGAGTTTTCATTGCTTGA	4
foxd5	CCAGCTGTGCTTAACTTATC	TGAGACCCAAAGTCACTTACT	3
gata2	CATTAACCCAAGCGGAGACT	CGCTGAAGGGAGACGACTT	New
gsc	TTCACCGATGAACAACTGGA	TTCCACTTTTGGGCATTTTC	2
id2	GGATTTGCTCTCGTCTGTGA	GTTATTTGCCACCCCATCTG	1
id3	TTACTAGCCAAGCCCCACAC	CTTGTACCATGCCTGCAGAA	1
itln1	AGCTGTTAACACTGAGAGGGC	ATTGTCTGGGACTTGCCTCTG	New
mixer	ACCAGCCCAGCACTTAACCA	AATGTTCTCTTGCGGCGTTGT	New
nodal2 (xnr2)	GTCTTCTATATCCAGCAGCAAT	TTGATGGAGATAATACTGGAGC	4
odc	GCCATTGTGAAGACTCTCTCCATTC	TTCGGGTGATTCCTTGCCAC	12
otx2	GGATGGATTTGTTACATCCGT	CACTCTCCGAGCTCACTTCCC	7
pdgfra	AAACTCTCTCATTGCGTCGAA	TGCTACCGATGTACCGCTTGAT	11
pou5f3.1	CCTTCACCTTTTGTTTTTA	TTTTTGGGTTTGGGAATG	1
pou5f3.2	ATGAAGGGCAGTTATGGTA	CAGTGGGGGTGGTGCTCA	1
p53	CGCAGCCGCTATGAGATGATT	CACTTGCGGCACTTAATGGT	New
siamois	CTGTCCTACAAGAGACTCTG	TGTTGACTGCAGACTGTTGA	12
snai2 (slug)	ATTTCCACATATGGCAGCAAGG	TGCCTGATTTAAACGCAACA	8
sox3	ATGAACGGCTGGACTAATGG	GGAGCTCTGCTGGTTGTAGG	8
sox17	GCAAGATGCTTGGCAAGTCG-	GCTGAAGTTCTCTAGACACA	2
szl (sizzled)	GGCAGAACCTCCTACAAACC	GAACGTGTCCAGGCAGACT	1
t/bra	TTCTGAAGGTGAGCATGTCG	GTTTGACTTTGCTAAAAGAGACAGG	14
tfap2a	CCCAACAGCCATACAGACA	AGTTGGTGGCTGCAGAAAGT-	8
ventx1	GCATCTCCTTGGCATATTTGG	TTCCCTTCAGCATGGTTCACC	9
ventx2	TTTCAGATGCTCTACCTGC	CAAATGGCCTTTCTTCCTG	13
ventx3	GCGTGCGGAATGTCCAAAAT	TCACACACAGGTTTGGCCTT	New
xk81a1	CACCAGAACACAGAGTAC	CAACCTTCCCATCAACCA	15
wnt8	CTGATGCCTTCAGTTCTGTGG	CTACCTGTTTGCATTGCTCGC	10
zic1	GCCAATAGCAGTGATCGTAAA	TTGGGAAGATGCTTCGTG	3
1. Lim JW, Hummert P, Mills JC, Kroll KL (2011) Geminin cooperates with Polycomb to restrain multi-lineage commitment in the early embryo. Development Jan;138(1):33-44.
2. Xanthos JB, Kofron M, Tao Q, Schaible K, Wylie C, Heasman J (2002) The roles of three signaling pathways in the formation and function of the Spemann Organizer. Development Sep;129(17):4027-43.
3. Marchal L, Luxardi G, Thomé V, Kodjabachian L (2010) BMP inhibition initiates neural induction via FGF signaling and Zic genes.Proc Natl Acad Sci U S A Oct 13;106(41):17437-42.
4. Kofron M, Wylie C, Heasman J (2004) The role of Mixer in patterning the early Xenopus embryo. Development May;131(10):2431-41.
5. Castillo-Briceno P, Kodjabachian L (2014) Xenopus embryonic epidermis as a mucociliary cellular ecosystem to assess the effect of sex hormones in a non-reproductive context. Front Zoo. Feb 6;11(1):9.
6. Houston DW, Wylie C (2003) The Xenopus LIM-homeodomain protein Xlim5 regulates the differential adhesion properties of early ectoderm cells. Development Jun;130(12):2695-704.
7. Sander V, Reversade B, De Robertis EM (2007) The opposing homeobox genes Goosecoid and Vent1/2 self-regulate Xenopus patterning. EMBO J. Jun 20;26(12):2955-65.
8. Morgan MJ, Woltering JM, In der Rieden PM, Durston AJ, Thiery JP (2004) YY1 regulates the neural crest-associated slug gene in Xenopus laevis. J Biol Chem. Nov 5;279(45):46826-34.
9. Gawantka V, Delius H, Hirschfeld K, Blumenstock C, Niehrs C (1995) Antagonizing the Spemann organizer: role of the homeobox gene Xvent-1. EMBO J. Dec 15;14(24):6268-79.
10. Ding X, Hausen P, Steinbeisser H (1998) Pre-MBT patterning of early gene regulation in Xenopus: the role of the cortical rotation and mesoderm induction. Mech Dev. Jan;70(1-2):15-24.
11. Luxardi G, Marchal L, Thomé V, Kodjabachian L (2012)Distinct Xenopus Nodal ligands sequentially induce mesendoderm and control gastrulation movements in parallel to the Wnt/PCP pathway.Development Feb;137(3):417-26.
12. Heasman J, Kofron M, Wylie C (2000) Beta-catenin signaling activity dissected in the early Xenopus embryo: a novel antisense approach.Dev Biol. Jun 1;222(1):124-34.
13. Gao H, Wu B, Giese R, Zhu Z (2007) Xom interacts with and stimulates transcriptional activity of LEF1/TCFs: implications for ventral cell fate determination during vertebrate embryogenesis. Cell Res. Apr;17(4):345-56.
14. Sun BI, Bush SM, Collins-Racie LA, LaVallie ER, DiBlasio-Smith EA, Wolfman NM, McCoy JM, Sive HL (1999) derrière: a TGF-beta family member required for posterior development in Xenopus. Development Apr;126(7):1467-82.
15. Xenopus Molecular Marker Resource, XMMR
